# Supplementary material for: Glycated Albumin is Independently Associated With Arterial Stiffness in Non-Diabetic Chronic Kidney Disease Patients
Source: PubMed Central journal article supplement (PMC4845823; doi:10.1097/md.0000000000003362), 2016-04-22
Supplement: medi-95-e3362-s001.pdf [file medi-95-e3362-s001.pdf]

**sTable 1. Characteristics of the whole study participants in each sex**

|                                      | <b>Non-diabetic CKD patients-Male</b> | <b>Non-diabetic CKD patients-Female</b> |
|--------------------------------------|---------------------------------------|-----------------------------------------|
| Age, y                               | 59 [29-82]                            | 57 [29-79]                              |
| Cause of CKD                         |                                       |                                         |
| <i>Hypertensive nephrosclerosis</i>  | 35 (56.5%)                            | 24 (36.4%)                              |
| <i>Glomerulonephritis</i>            | 14 (22.6%)                            | 19 (28.8%)                              |
| <i>Others</i>                        | 2 (3.2%)                              | 5 (7.6%)                                |
| <i>Unknown</i>                       | 11 (17.7%)                            | 18 (27.3%)                              |
| Cardiovascular disease               | 14 (22.2%)                            | 6 (9.1%)                                |
| Cerebrovascular disease              | 5 (7.9%)                              | 7 (10.6%)                               |
| ACEi or ARB use                      | 54 (85.7%)                            | 47 (71.2%)                              |
| CCB use                              | 19 (30.2%)                            | 16 (24.2%)                              |
| Statin use                           | 39 (61.9%)                            | 44 (66.7%)                              |
| BMI, kg/m <sup>2</sup>               | 24.1 [15.9-29.8]                      | 22.6 [16.9-33.9]                        |
| Systolic blood pressure, mmHg        | 128 [104-187]                         | 126 [92-183]                            |
| Diastolic blood pressure, mmHg       | 82 [62-106]                           | 77 [56-121]                             |
| Total cholesterol, mg/dL             | 167 [116-279]                         | 164 [116-236]                           |
| Triglyceride, mg/dL                  | 124 [47-441]                          | 90.0 [41-335]                           |
| HDL-cholesterol, mg/dL               | 40 [28-76]                            | 50 [27-110]                             |
| LDL-cholesterol, mg/dL               | 98 [57-217]                           | 95 [48-165]                             |
| Albumin, g/dL                        | 4.5 [3.6-4.9]                         | 4.4 [3.0-5.0]                           |
| eGFRcr-cys, ml/min1.73m <sup>2</sup> | 54 [15-114]                           | 55 [7-127]                              |
| UPCR, mg/g                           | 278.7 [18.1-6920.0]                   | 158.6 [3.7-4112.6]                      |
| Fasting glucose, mg/dL               | 98 [72-141]                           | 94 [67-142]                             |
| Fasting insulin, mIU/mL              | 8.1 [2.1-29.6]                        | 6.9 [2.7-24.7]                          |
| HOMA-IR                              | 1.9 [0.5-7.4]                         | 1.7 [0.5-7.7]                           |
| GA, %                                | 13.5 [8.7-20.2]                       | 13.6 [8.8-18.2]                         |
| baPWV, cm/sec                        | 1486.0 [1092.5-2956.0]                | 1424.0 [1085.5-2554.0]                  |

Data are expressed as number (%) or median [interquartile range]. ACEi; angiotensin-converting enzyme inhibitors, ARB; angiotensin II-receptor blockers, CCB; calcium channel blockers, BMI; body mass index, eGFRcr-cys; estimated GFR measured by serum creatinine and cystatin C, UPCR; urine protein-creatinine ratio, GA; Glycated albumin, HOMA-IR; The homeostatic model assessment of insulin resistance, baPWV; brachial-ankle pulse wave velocity
